# Supplementary material for: Performances of Limited Area Models for the WORKLIMATE Heat–Health Warning System to Protect Worker’s Health and Productivity in Italy
Source: MDPI journal article supplement (doi:10.3390/ijerph18189940), 2021-09-21
Supplement: s1 [file s1]

## Supplementary material

Table S1. Day 3-WBGT-shade average categorical skill scores for the 12-18 time slot for each geographical macro-areas. In the “northern inland plain areas”, Bolzano values were not included in the average.

|       | A    |       |       | B    |       |       | C    |       |       |
|-------|------|-------|-------|------|-------|-------|------|-------|-------|
| Model | BOL  | MOL_E | MOL_G | BOL  | MOL_E | MOL_G | BOL  | MOL_E | MOL_G |
| Data  | 1902 | 1116  | 594   | 1895 | 1111  | 590   | 1887 | 1190  | 723   |
| HR    | 80.1 | 75.2  | 73.5  | 78.8 | 77.4  | 76.1  | 73.4 | 77.0  | 77.1  |
| CSI   | 75.0 | 71.4  | 68.0  | 74.9 | 75.4  | 72.0  | 68.0 | 74.7  | 72.9  |
| POD1  | 78.1 | 75.2  | 80.9  | 81.7 | 78.0  | 81.9  | 78.1 | 78.2  | 81.1  |
| POD2  | 87.5 | 92.9  | 89.6  | 75.2 | 86.8  | 85.7  | 63.4 | 86.1  | 88.0  |
| POD3  |      |       |       |      |       |       |      |       |       |
| POD1x | 95.4 | 96.4  | 96.5  | 94.9 | 96.9  | 95.0  | 88.2 | 95.3  | 94.1  |
| POD2x | 87.8 | 93.5  | 89.9  | 75.3 | 87.4  | 86.1  | 63.5 | 86.2  | 88.1  |
| NA    | 10.5 | 12.8  | 9.8   | 13.8 | 17.5  | 15.8  | 24.0 | 26.0  | 22.5  |
| FA    | 22.6 | 43.0  | 46.9  | 19.6 | 46.7  | 45.9  | 14.3 | 46.2  | 44.1  |
| NA*   | 2.5  | 1.9   | 1.8   | 2.3  | 1.4   | 2.6   | 5.4  | 2.4   | 3.1   |
| FA*   | 5.9  | 9.7   | 15.0  | 3.7  | 6.2   | 10.6  | 2.9  | 6.5   | 9.8   |
| RLO 1 | 52.9 | 53.9  | 52.9  | 46.2 | 49.9  | 53.8  | 48.0 | 51.9  | 54.7  |
| RLO 2 | 20.8 | 23.3  | 14.9  | 34.2 | 35.5  | 21.1  | 32.3 | 33.0  | 20.8  |
| RLO 3 | 0.0  | 0.0   | 0.0   | 0.4  | 0.4   | 0.2   | 0.3  | 0.3   | 0.1   |
| RLP 1 | 49.6 | 51.5  | 59.1  | 50.3 | 50.0  | 58.0  | 53.1 | 51.6  | 56.7  |
| RLP 2 | 27.4 | 33.3  | 21.9  | 31.8 | 40.2  | 25.0  | 25.0 | 37.5  | 25.6  |
| RLP 3 | 0.1  | 0.2   | 0.1   | 0.0  | 0.4   | 0.2   | 0.0  | 0.0   | 0.0   |

Model: BOL, BOLAM initialized on the GFS; MOL-E, MOLOCH initialized on the ECMWF; MOL-G, MOLOCH initialized on the ECMWF; Data, sample size; HR, hit Rate (%); CSI, critical success index (%); POD1, probability of risk level 1 detection (%); POD2, probability of risk level class 2 detection (%); POD3, probability of risk level 3 detection (%); POD1x, probability of risk level 1 or higher class detection (%); POD2x, probability of risk level 2 or higher class detection (%); NA, lack alarm (%); FA, false alarm (%); NA\*, normalized lack alarm (%); NA\*, normalized false alarm (%); RLO1, risk level 1 observed (%); RLO2, risk level 2 observed (%); RLO3, risk level 3 observed (%); RLP1, risk level1 predicted (%); RLP2, risk level2 predicted (%); RLP3, risk level 3 predicted (%); empty cell, it was not possible to calculate the indicator due to the lack of data observed or predicted by the model for at least one location.

Table S2. Day 3-WBGT-sun average categorical skill scores for the 12-18 time slot for each geographical macro-areas. In the “northern inland plain areas” (A), Bolzano values were not included in the average.

|       | A    |       |       | B    |       |       | C    |       |       |
|-------|------|-------|-------|------|-------|-------|------|-------|-------|
| Model | BOL  | MOL_E | MOL_G | BOL  | MOL_E | MOL_G | BOL  | MOL_E | MOL_G |
| Data  | 1884 | 1105  | 592   | 1892 | 1109  | 589   | 1886 | 1105  | 593   |
| HR    | 76.7 | 72.9  | 72.2  | 79.9 | 78.9  | 76.7  | 71.5 | 75.8  | 75.5  |
| CSI   | 72.5 | 69.9  | 68.4  | 77.6 | 78.2  | 75.3  | 68.2 | 74.9  | 74.1  |
| POD1  | 69.9 | 70.2  | 74.2  | 74.7 | 75.5  | 80.4  | 71.7 | 76.4  | 80.7  |
| POD2  | 86.5 | 86.6  | 87.8  | 88.1 | 91.4  | 90.0  | 76.3 | 86.2  | 85.4  |
| POD3  | 53.9 | 60.3  | 44.0  | 17.7 | 34.1  | 34.0  | 9.0  | 40.0  | 52.0  |
| POD1x | 93.4 | 94.9  | 95.2  | 94.5 | 96.8  | 96.8  | 85.5 | 93.9  | 93.7  |
| POD2x | 90.0 | 93.6  | 92.7  | 88.7 | 93.6  | 92.2  | 77.0 | 88.7  | 87.6  |
| NA    | 13.7 | 17.0  | 17.9  | 15.5 | 29.8  | 23.5  | 28.6 | 37.9  | 35.0  |
| FA    | 32.9 | 56.0  | 59.4  | 26.8 | 66.8  | 63.5  | 21.0 | 61.4  | 60.6  |
| NA*   | 2.4  | 1.6   | 1.8   | 1.7  | 0.9   | 1.4   | 4.5  | 1.6   | 2.5   |
| FA*   | 6.3  | 8.7   | 11.8  | 3.8  | 5.2   | 8.7   | 3.0  | 4.8   | 7.6   |
| RLO 1 | 40.9 | 43.8  | 49.9  | 35.4 | 40.0  | 50.8  | 35.1 | 40.2  | 49.7  |
| RLO 2 | 36.2 | 36.4  | 25.4  | 49.1 | 49.7  | 33.7  | 47.5 | 48.0  | 34.8  |
| RLO 3 | 0.6  | 0.9   | 0.6   | 1.7  | 2.1   | 1.2   | 4.3  | 3.9   | 2.6   |
| RLP 1 | 37.7 | 41.2  | 49.9  | 35.9 | 38.5  | 52.4  | 39.5 | 40.7  | 52.0  |
| RLP 2 | 42.1 | 43.4  | 34.1  | 52.0 | 56.0  | 39.7  | 45.3 | 52.7  | 39.1  |
| RLP 3 | 1.7  | 3.5   | 2.0   | 0.4  | 1.5   | 1.0   | 0.5  | 1.9   | 1.3   |

Model: BOL, BOLAM initialized on the GFS; MOL-E, MOLOCH initialized on the ECMWF; MOL-G, MOLOCH initialized on the ECMWF; Data, sample size; HR, hit Rate (%); CSI, critical success index (%); POD1, probability of risk level 1 detection (%); POD2, probability of risk level class 2 detection (%); POD3, probability of risk level 3 detection (%); POD1x, probability of risk level 1 or higher class detection (%); POD2x, probability of risk level 2 or higher class detection (%); NA, lack alarm (%); FA, false alarm (%); NA\*, normalized lack alarm (%); NA\*, normalized false alarm (%); RLO1, risk level 1 observed (%); RLO2, risk level 2 observed (%); RLO3, risk level 3 observed (%); RLP1, risk level1 predicted (%); RLP2, risk level2 predicted (%); RLP3, risk level 3 predicted (%); empty cell, it was not possible to calculate the indicator due to the lack of data observed or predicted by the model for at least one location.

Table S3. Average values of Mean error, mean absolute error and root mean square error of the Day 3-WBGT-sun predicted for the 12-18 time slot for the three geographical macro-areas. The scores were calculated both considering all its hourly data and the its maximum value. In the “northern inland plain areas” (A), Bolzano values were not included in the average.

|         | A    |       |       | B    |       |       | C    |       |       |
|---------|------|-------|-------|------|-------|-------|------|-------|-------|
| Model   | BOL  | MOL_E | MOL_G | BOL  | MOL_E | MOL_G | BOL  | MOL_E | MOL_G |
| MAE     | 1.5  | 1.6   | 1.8   | 1.2  | 1.3   | 1.3   | 1.5  | 1.3   | 1.3   |
| RMSE    | 2.0  | 2.2   | 2.3   | 1.6  | 1.6   | 1.7   | 1.9  | 1.7   | 1.7   |
| ME      | 0.8  | 1.2   | 1.4   | 0.1  | 0.6   | 0.7   | -0.4 | 0.5   | 0.7   |
| Data    | 1896 | 1113  | 592   | 1892 | 1109  | 589   | 1887 | 1104  | 593   |
| MAEmax  | 1.2  | 1.4   | 1.6   | 1.2  | 1.2   | 1.3   | 1.5  | 1.3   | 1.2   |
| RMSEmax | 1.7  | 1.9   | 2.0   | 1.5  | 1.5   | 1.6   | 1.8  | 1.6   | 1.6   |
| MEmax   | 0.6  | 1.1   | 1.4   | -0.1 | 0.5   | 0.7   | -0.6 | 0.6   | 0.8   |
| Datamax | 317  | 186   | 99    | 317  | 186   | 99    | 315  | 184   | 99    |

Model: BOL, BOLAM initialized on the GFS; MOL-E, MOLOCH initialized on the ECMWF; MOL-G, MOLOCH initialized on the ECMWF; MAE, mean absolute error; RMSE, root mean square error; ME, mean error; Data, sample size; MAEmax, mean absolute error of the maximum time slot value; RMSEmax, root mean square error of the maximum time slot value; MEmax, mean error of the maximum time slot value; Datamax, maximum value sample size.

Table S4. Average values of Mean error, mean absolute error and root mean square error of the Day 3-WBGT-shade predicted for the 12-18 time slot for the three geographical macro-areas. The scores were calculated both considering all its hourly data and the its maximum value. In the “northern inland plain areas” (A), Bolzano values were not included in the average.

|         | A     |       |       | B     |       |       | C     |       |       |
|---------|-------|-------|-------|-------|-------|-------|-------|-------|-------|
| Model   | BOL   | MOL_E | MOL_G | BOL_G | MOL_E | MOL_G | BOL_G | MOL_E | MOL_G |
| MAE     | 1.2   | 1.3   | 1.4   | 1.1   | 1.1   | 1.1   | 1.4   | 1.1   | 1.1   |
| RMSE    | 1.6   | 1.7   | 1.8   | 1.4   | 1.4   | 1.4   | 1.8   | 1.5   | 1.4   |
| ME      | 0.5   | 1.0   | 1.1   | -0.1  | 0.3   | 0.5   | -0.6  | 0.3   | 0.5   |
| Data    | 1902  | 1116  | 594   | 1892  | 1107  | 587   | 1891  | 1106  | 594   |
| MAEmax  | 1.1   | 1.3   | 1.4   | 1.1   | 1.1   | 1.1   | 1.4   | 1.1   | 1.1   |
| RMSEmax | 1.4   | 1.7   | 1.7   | 1.4   | 1.3   | 1.4   | 1.7   | 1.4   | 1.4   |
| MEmax   | 0.4   | 1.1   | 1.3   | -0.3  | 0.3   | 0.4   | -0.8  | 0.4   | 0.6   |
| Datamax | 317.0 | 186.0 | 99.0  | 316.2 | 185.2 | 98.2  | 315.3 | 184.4 | 99.0  |

Model: BOL, BOLAM initialized on the GFS; MOL-E, MOLOCH initialized on the ECMWF; MOL-G, MOLOCH initialized on the ECMWF; MAE, mean absolute error; RMSE, root mean square error; ME, mean error; Data, sample size; MAEmax, mean absolute error of the maximum time slot value; RMSEmax, root mean square error of the maximum time slot value; MEmax, mean error of the maximum time slot value; Datamax, maximum value sample size.
